# Supplementary material for: Using earth observation for national high resolution dynamic material stock modelling through time; Assessing sand consumption in Malaysia from 1989 to 2020
Source: Research Square preprint supplement (doi:10.21203/rs.3.rs-8319868/v1), 2026-01-22
Supplement: Supplementary file 3 [file ff77fb3cb9022d822fe5bc1d.xlsx]

## Sheet: by Province
Material stock by province and material type
total building stock
province	cement	brick and tile	sand	gravel/crushed rock
Johor	4.96011e+07	1.91274e+08	1.64194e+08	1.45736e+08
Kedah	3.07307e+07	1.05542e+08	9.7276e+07	8.77029e+07
Kelantan	2.15721e+07	7.48493e+07	6.57571e+07	6.1905e+07
Melaka	1.38409e+07	4.76321e+07	4.3347e+07	4.00145e+07
Negeri Sembilan	1.72107e+07	7.17181e+07	6.16328e+07	4.92005e+07
Pahang	1.60919e+07	9.28696e+07	7.15897e+07	4.79443e+07
Perak	3.80147e+07	1.48135e+08	1.27526e+08	1.11404e+08
Perlis	3.83492e+06	1.36187e+07	1.19365e+07	1.11641e+07
Pulau Pinang	2.62518e+07	6.52873e+07	6.7323e+07	7.55395e+07
Sabah	3.02999e+07	1.41416e+08	1.13798e+08	8.9626e+07
Sarawak	3.30529e+07	1.89012e+08	1.47148e+08	9.6298e+07
Selangor	9.55187e+07	2.5225e+08	2.63783e+08	2.7702e+08
Terengganu	1.55079e+07	5.96849e+07	5.04907e+07	4.45648e+07
W.P. Kuala Lumpur	2.66573e+07	5.87231e+07	6.15316e+07	7.50931e+07
W.P. Labuan	2.05738e+06	4.05538e+06	4.17946e+06	6.15239e+06
W.P. Putrajaya	882879	2.81554e+06	2.68409e+06	2.49803e+06
No location	199834	1.00211e+06	736348	639781
	4.21126e+08	1.51888e+09	1.3542e+09	1.22186e+09
tonnes of construction material	4.51607e+09
≤1988, total
province	cement	brick and tile	sand	gravel/crushed rock
Johor	1.49282e+07	8.12114e+07	5.23635e+07	5.3075e+07
Kedah	8.30493e+06	4.02488e+07	2.68413e+07	2.81461e+07
Kelantan	7.09834e+06	3.20011e+07	2.1742e+07	2.35376e+07
Melaka	3.53134e+06	1.70188e+07	1.14138e+07	1.19669e+07
Negeri Sembilan	3.86383e+06	2.58241e+07	1.53522e+07	1.50521e+07
Pahang	4.34866e+06	4.40709e+07	2.34957e+07	2.12144e+07
Perak	1.48168e+07	7.46308e+07	4.91273e+07	5.10182e+07
Perlis	1.18036e+06	5.83848e+06	3.81225e+06	4.03495e+06
Pulau Pinang	1.1969e+07	3.31491e+07	2.90499e+07	3.38285e+07
Sabah	8.83224e+06	6.63206e+07	3.79115e+07	3.62983e+07
Sarawak	7.50887e+06	8.05741e+07	4.21063e+07	3.75752e+07
Selangor	2.82038e+07	9.13142e+07	7.46144e+07	8.33081e+07
Terengganu	5.77507e+06	2.78072e+07	1.83882e+07	1.95512e+07
W.P. Kuala Lumpur	1.96133e+07	4.73294e+07	4.38937e+07	5.36049e+07
W.P. Labuan	449099	1.10189e+06	995459	1.23352e+06
W.P. Putrajaya	158678	705782	510304	519842
No location	61757.7	555628	301557	278736
total	1.40644e+08	6.69702e+08	4.51919e+08	4.74244e+08
>1988 & ≤1998, total
province	cement	brick and tile	sand	gravel/crushed rock
Johor	1.22611e+07	4.26902e+07	4.63148e+07	3.35299e+07
Kedah	6.91218e+06	1.7277e+07	2.39585e+07	1.96098e+07
Kelantan	3.19637e+06	8.00106e+06	1.09319e+07	9.03438e+06
Melaka	3.69557e+06	1.0925e+07	1.34127e+07	1.03139e+07
Negeri Sembilan	4.75591e+06	1.87858e+07	1.85741e+07	1.27778e+07
Pahang	4.38405e+06	2.35118e+07	1.86861e+07	1.10214e+07
Perak	9.00194e+06	2.89377e+07	3.32916e+07	2.48221e+07
Perlis	829697	2.19352e+06	2.88394e+06	2.33385e+06
Pulau Pinang	5.24559e+06	6.88913e+06	1.69666e+07	1.56173e+07
Sabah	7.60974e+06	2.9726e+07	2.74796e+07	2.04889e+07
Sarawak	1.03171e+07	5.55746e+07	4.40276e+07	2.60771e+07
Selangor	2.50839e+07	4.1039e+07	8.38507e+07	7.38395e+07
Terengganu	2.73369e+06	9.75965e+06	1.02065e+07	7.39161e+06
W.P. Kuala Lumpur	3.88278e+06	3.03617e+06	1.16773e+07	1.17685e+07
W.P. Labuan	740925	653117	1.61319e+06	2.26097e+06
W.P. Putrajaya	219489	623287	801676	619985
No location	22745.2	97927	89086.9	59480.1
total	1.00893e+08	2.99721e+08	3.64766e+08	2.81567e+08
>1998, total
province	cement	brick and tile	sand	gravel/crushed rock
Johor	2.24119e+07	6.73725e+07	6.55155e+07	5.91312e+07
Kedah	1.55136e+07	4.80166e+07	4.64762e+07	3.9947e+07
Kelantan	1.12774e+07	3.48471e+07	3.30832e+07	2.93331e+07
Melaka	6.61399e+06	1.96884e+07	1.85205e+07	1.77337e+07
Negeri Sembilan	8.591e+06	2.71082e+07	2.77065e+07	2.13706e+07
Pahang	7.35919e+06	2.52868e+07	2.94079e+07	1.57084e+07
Perak	1.41959e+07	4.45666e+07	4.51069e+07	3.55633e+07
Perlis	1.82486e+06	5.58668e+06	5.24027e+06	4.79531e+06
Pulau Pinang	9.03723e+06	2.5249e+07	2.13066e+07	2.60936e+07
Sabah	1.38579e+07	4.53694e+07	4.84069e+07	3.28388e+07
Sarawak	1.52269e+07	5.28631e+07	6.10137e+07	3.26456e+07
Selangor	4.2231e+07	1.19897e+08	1.05318e+08	1.19873e+08
Terengganu	6.99911e+06	2.2118e+07	2.1896e+07	1.7622e+07
W.P. Kuala Lumpur	3.1613e+06	8.35754e+06	5.9606e+06	9.71968e+06
W.P. Labuan	867354	2.30038e+06	1.57081e+06	2.65791e+06
W.P. Putrajaya	504712	1.48647e+06	1.37211e+06	1.35821e+06
No location	115331	348560	344426	301564
total	1.79789e+08	5.50462e+08	5.38246e+08	4.66693e+08
cement
province	≤1988, total	>1988 & ≤1998, total	>1998, total
Johor	1.49282e+07	1.22611e+07	2.24119e+07
Kedah	8.30493e+06	6.91218e+06	1.55136e+07
Kelantan	7.09834e+06	3.19637e+06	1.12774e+07
Melaka	3.53134e+06	3.69557e+06	6.61399e+06
Negeri Sembilan	3.86383e+06	4.75591e+06	8.591e+06
Pahang	4.34866e+06	4.38405e+06	7.35919e+06
Perak	1.48168e+07	9.00194e+06	1.41959e+07
Perlis	1.18036e+06	829697	1.82486e+06
Pulau Pinang	1.1969e+07	5.24559e+06	9.03723e+06
Sabah	8.83224e+06	7.60974e+06	1.38579e+07
Sarawak	7.50887e+06	1.03171e+07	1.52269e+07
Selangor	2.82038e+07	2.50839e+07	4.2231e+07
Terengganu	5.77507e+06	2.73369e+06	6.99911e+06
W.P. Kuala Lumpur	1.96133e+07	3.88278e+06	3.1613e+06
W.P. Labuan	449099	740925	867354
W.P. Putrajaya	158678	219489	504712
No location	61757.7	22745.2	115331
	4.21326e+08
Brick and tiles
province	≤1988, total	>1988 & ≤1998, total	>1998, total
Johor	8.12114e+07	4.26902e+07	6.73725e+07
Kedah	4.02488e+07	1.7277e+07	4.80166e+07
Kelantan	3.20011e+07	8.00106e+06	3.48471e+07
Melaka	1.70188e+07	1.0925e+07	1.96884e+07
Negeri Sembilan	2.58241e+07	1.87858e+07	2.71082e+07
Pahang	4.40709e+07	2.35118e+07	2.52868e+07
Perak	7.46308e+07	2.89377e+07	4.45666e+07
Perlis	5.83848e+06	2.19352e+06	5.58668e+06
Pulau Pinang	3.31491e+07	6.88913e+06	2.5249e+07
Sabah	6.63206e+07	2.9726e+07	4.53694e+07
Sarawak	8.05741e+07	5.55746e+07	5.28631e+07
Selangor	9.13142e+07	4.1039e+07	1.19897e+08
Terengganu	2.78072e+07	9.75965e+06	2.2118e+07
W.P. Kuala Lumpur	4.73294e+07	3.03617e+06	8.35754e+06
W.P. Labuan	1.10189e+06	653117	2.30038e+06
W.P. Putrajaya	705782	623287	1.48647e+06
No location	555628	97927	348560
Sand
province	≤1988, total	>1988 & ≤1998, total	>1998, total
Johor	5.23635e+07	4.63148e+07	6.55155e+07
Kedah	2.68413e+07	2.39585e+07	4.64762e+07
Kelantan	2.1742e+07	1.09319e+07	3.30832e+07
Melaka	1.14138e+07	1.34127e+07	1.85205e+07
Negeri Sembilan	1.53522e+07	1.85741e+07	2.77065e+07
Pahang	2.34957e+07	1.86861e+07	2.94079e+07
Perak	4.91273e+07	3.32916e+07	4.51069e+07
Perlis	3.81225e+06	2.88394e+06	5.24027e+06
Pulau Pinang	2.90499e+07	1.69666e+07	2.13066e+07
Sabah	3.79115e+07	2.74796e+07	4.84069e+07
Sarawak	4.21063e+07	4.40276e+07	6.10137e+07
Selangor	7.46144e+07	8.38507e+07	1.05318e+08
Terengganu	1.83882e+07	1.02065e+07	2.1896e+07
W.P. Kuala Lumpur	4.38937e+07	1.16773e+07	5.9606e+06
W.P. Labuan	995459	1.61319e+06	1.57081e+06
W.P. Putrajaya	510304	801676	1.37211e+06
No location	301557	90366.2	344426
gravel/crushed rock
province	≤1988, total	>1988 & ≤1998, total	>1998, total
Johor	5.3075e+07	3.35299e+07	5.91312e+07
Kedah	2.81461e+07	1.96098e+07	3.9947e+07
Kelantan	2.35376e+07	9.03438e+06	2.93331e+07
Melaka	1.19669e+07	1.03139e+07	1.77337e+07
Negeri Sembilan	1.50521e+07	1.27778e+07	2.13706e+07
Pahang	2.12144e+07	1.10214e+07	1.57084e+07
Perak	5.10182e+07	2.48221e+07	3.55633e+07
Perlis	4.03495e+06	2.33385e+06	4.79531e+06
Pulau Pinang	3.38285e+07	1.56173e+07	2.60936e+07
Sabah	3.62983e+07	2.04889e+07	3.28388e+07
Sarawak	3.75752e+07	2.60771e+07	3.26456e+07
Selangor	8.33081e+07	7.38395e+07	1.19873e+08
Terengganu	1.95512e+07	7.39161e+06	1.7622e+07
W.P. Kuala Lumpur	5.36049e+07	1.17685e+07	9.71968e+06
W.P. Labuan	1.23352e+06	2.26097e+06	2.65791e+06
W.P. Putrajaya	519842	619985	1.35821e+06
No location	278736	59480.1	301564

## Sheet: totals
	time period	cement	brick and tile	sand	gravel/crushed rock
	≤1988, total	1.40644e+08	6.69702e+08	4.51919e+08	4.74244e+08
	>1988 & ≤1998, total	1.00893e+08	2.99721e+08	3.64766e+08	2.81567e+08
	>1998, total	1.79789e+08	5.50462e+08	5.38246e+08	4.66693e+08
